# Supplementary material for: Bumblebee Pollination Enhances Yield and Flavor of Tomato in Gobi Desert Greenhouses
Source: MDPI journal article supplement (doi:10.3390/agriculture12060795), 2022-05-31
Supplement: s1 [file s1 › agriculture-1719437-supplementary.pdf]

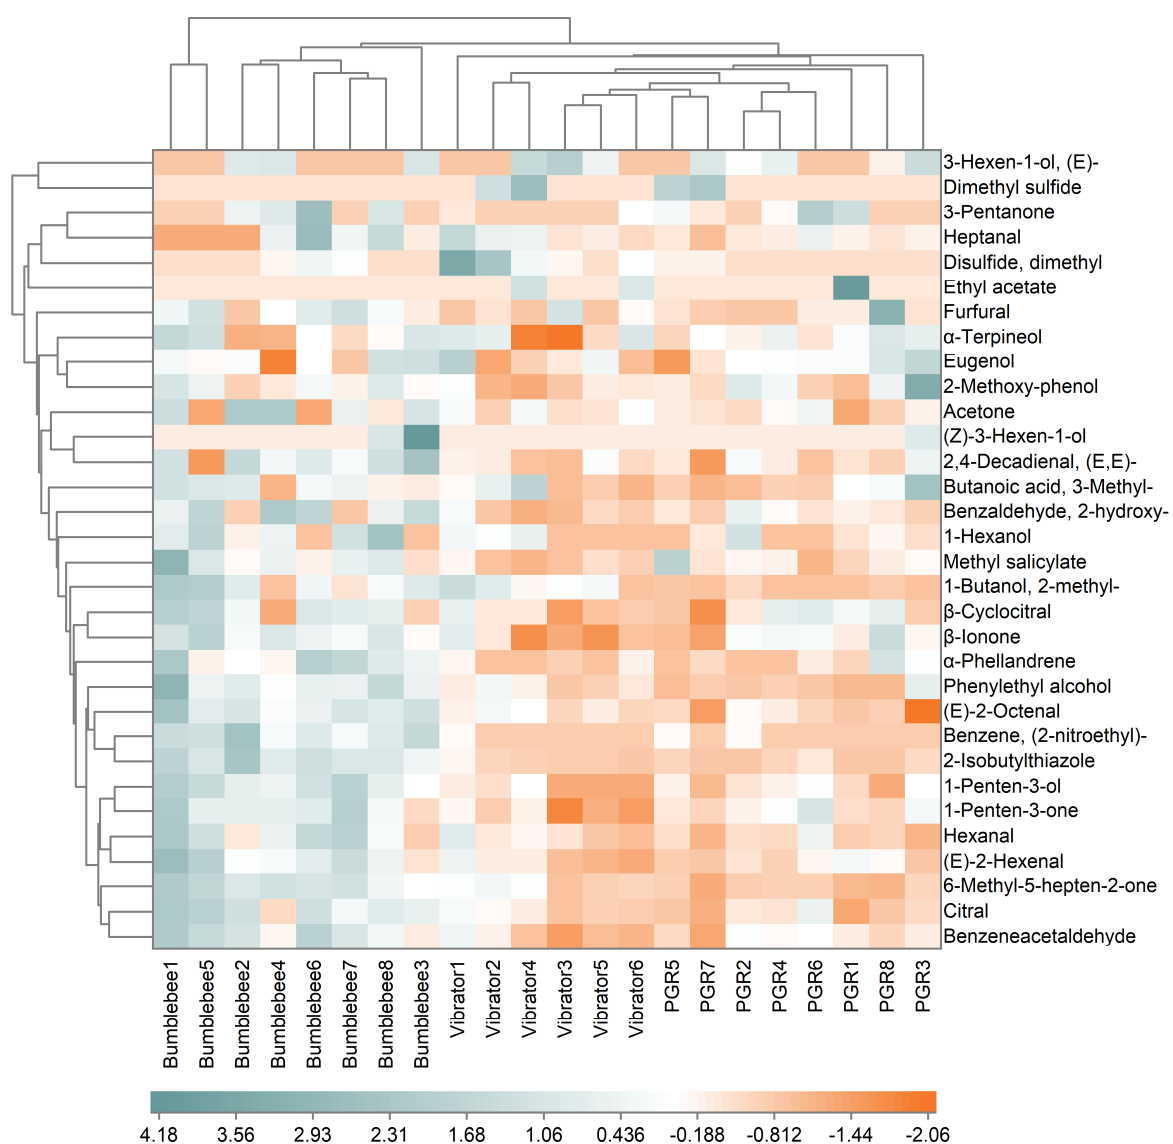

**Figure S1.** Hierarchical cluster analysis of consumer liking related volatile organic compound profiles of tomato fruits by different pollination treatments.
